# Supplementary material for: Identification of serum metabolome signatures associated with retinal and renal complications of type 2 diabetes
Source: PubMed Central journal article supplement (PMC9829655; doi:10.1038/s43856-022-00231-3), 2023-01-09
Supplement: 43856_2022_231_MOESM1_ESM.pdf [file 43856_2022_231_MOESM1_ESM.pdf]

## Supplementary information

### **Identification of serum metabolome signatures associated with retinal and renal complications of type 2 diabetes**

Yoshihiko Tomofuji, Ken Suzuki, Toshihiro Kishikawa, Nobuhiro Shojima, Jun Hosoe, Kyoko Inagaki, Sunao Matsubayashi, Hisamitsu Ishihara, Hiroataka Watada, Yasushi Ishigaki, The BioBank Japan Project, Hidenori Inohara, Yoshinori Murakami, Koichi Matsuda, Yukinori Okada, Toshimasa Yamauchi, Takashi Kadowaki

#### **Table of contents**

|                                                                                                            |          |
|------------------------------------------------------------------------------------------------------------|----------|
| <b>■Supplementary Figures</b> .....                                                                        | <b>1</b> |
| 1. Results of the linear regression analysis to obtain the covariates-adjusted metabolite abundances ..... | 1        |
| 2. Raw abundances of the metabolites associated with the complications of the T2D .....                    | 3        |
| <b>■Supplementary table</b> .....                                                                          | <b>4</b> |
| 1. Wilcoxon rank sum test for the metabolites associated with the complications of T2D .....               | 4        |

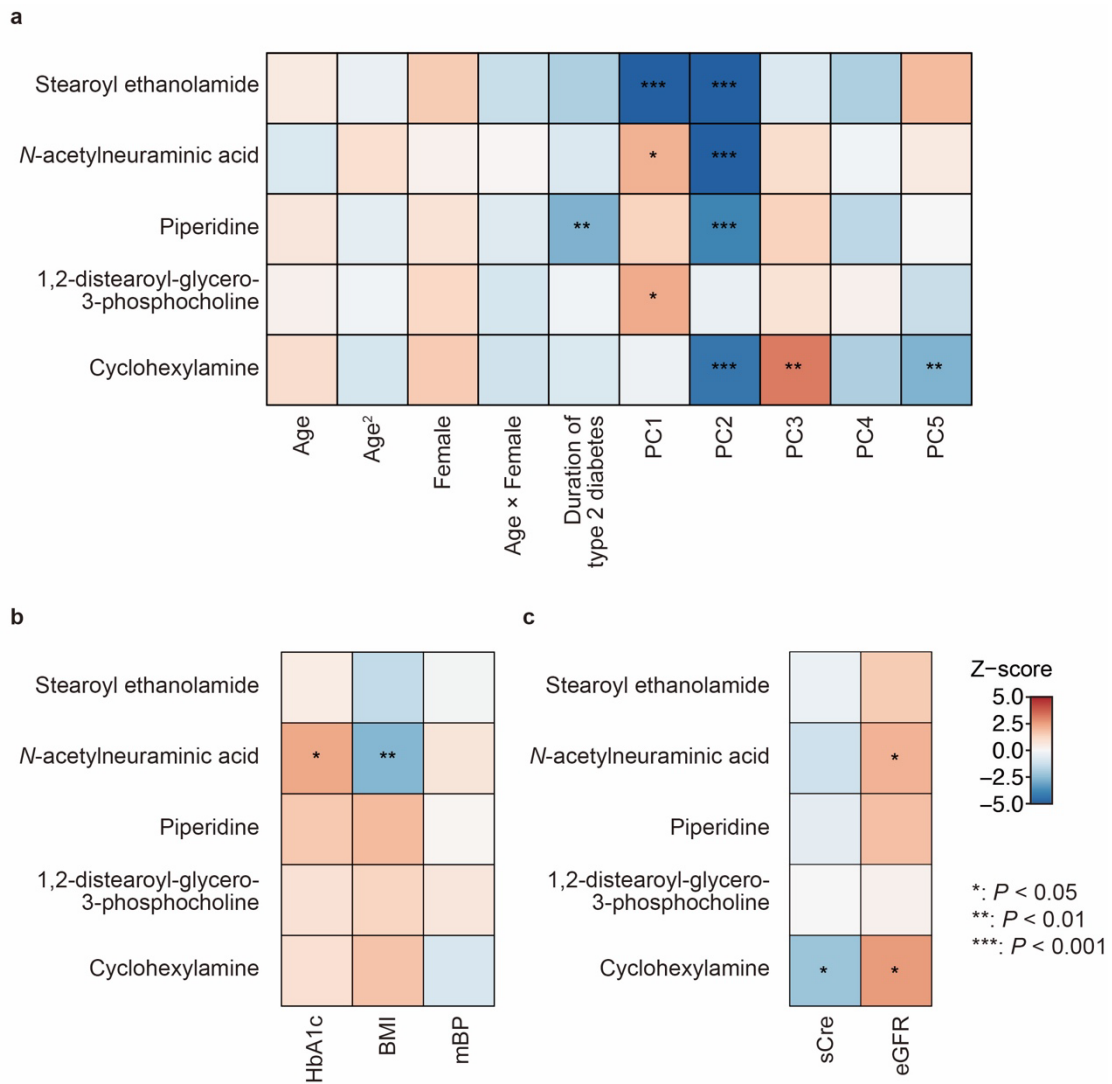

**Supplementary Fig. 1 | Results of the linear regression analysis to obtain the covariates-adjusted metabolite abundances.**

Heatmaps represent the Z-score of the covariates in the linear regression to obtain the covariate-adjusted metabolite abundances. (a), (b), and (c) correspond to **Fig. 1**, **Fig. 2a**, and **Fig. 2b**, respectively. The x-axis indicates the covariates and the y-axis indicates the metabolites. The color of the tile indicates the Z-score (effect size / standard error) in the linear regression. The asterisk indicates the significance of Wald's tests. Number of samples used for the analyses are following; **a**,  $N_{\text{DR} + \text{DKD}} = 141$  and  $N_{\text{control}} = 159$  for all the covariates; **b**,  $N_{\text{DR} + \text{DKD}} = 109$  and  $N_{\text{control}} = 112$  for HbA1c,  $N_{\text{DR} + \text{DKD}} = 131$  and  $N_{\text{control}} = 132$  for mBP, and  $N_{\text{DR} + \text{DKD}} = 135$  and  $N_{\text{control}} = 147$  for BMI; **c**,  $N_{\text{DR} + \text{DKD}} = 139$ ,  $N_{\text{control}} = 157$  for sCre and eGFR.

BMI, body mass index; DKD, diabetic kidney disease; DR diabetic retinopathy; eGFR, estimated glomerular filtration rate; HbA1c, hemoglobin A1c; mBP, mean blood pressure; PC, principal component; sCre, serum creatinine.

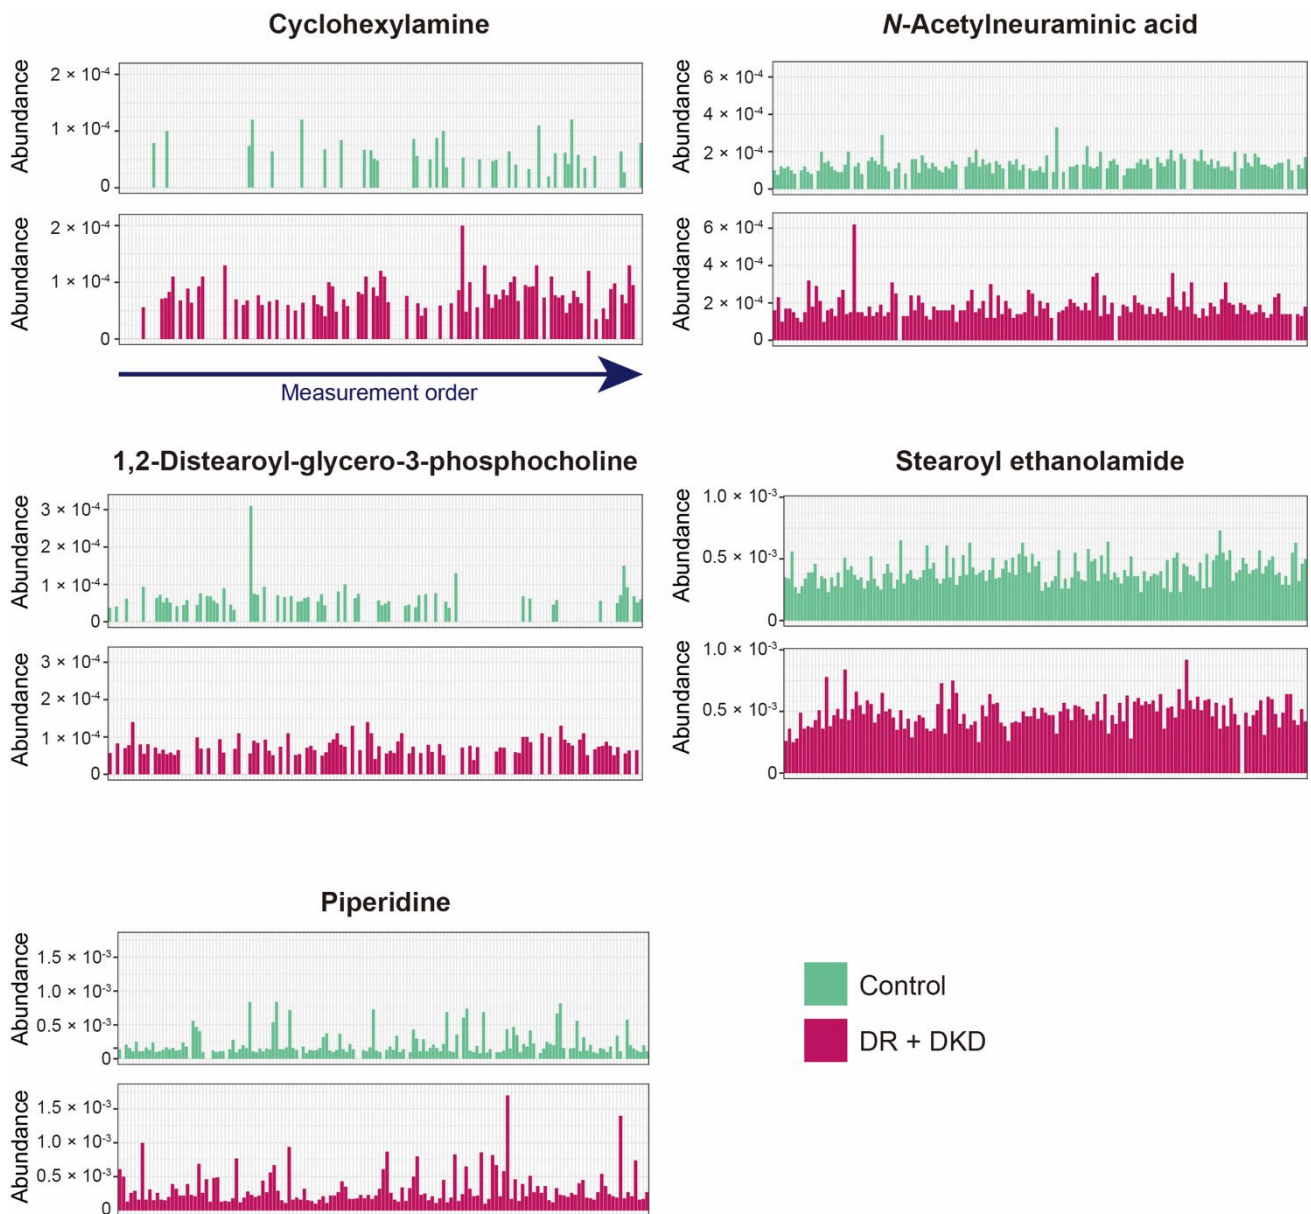

**Supplementary Fig. 2 | Raw abundances of the metabolites associated with the complications of the T2D.**

Bar plots represent the raw abundances of the metabolites associated with the complications of T2D. The x-axis indicates the order of the measurements and the y-axis indicates the raw abundances of the metabolites. The number of samples used for the analysis is  $N_{DR + DKD} = 141$  and  $N_{control} = 159$ . DKD, diabetic kidney disease; DR diabetic retinopathy; T2D, type 2 diabetes.

**Supplementary Table 1 | Wilcoxon rank sum test for the metabolites associated with the complications of T2D.**

| Metabolite                              | Control              |                      |                      |          | DR + DKD             |                      |                      |          | <i>P</i>              |
|-----------------------------------------|----------------------|----------------------|----------------------|----------|----------------------|----------------------|----------------------|----------|-----------------------|
|                                         | Median               | 1st Q.               | 3rd Q.               | <i>N</i> | Median               | 1st Q.               | 3rd Q.               | <i>N</i> |                       |
| Cyclohexylamine                         | 0.0                  | 0.0                  | 0.0                  | 159      | $5.6 \times 10^{-5}$ | 0.0                  | $7.7 \times 10^{-5}$ | 141      | $6.1 \times 10^{-12}$ |
| 1,2-Distearoyl-glycero-3-phosphocholine | 0.0                  | 0.0                  | $5.5 \times 10^{-5}$ | 159      | $5.7 \times 10^{-5}$ | 0.0                  | $7.6 \times 10^{-5}$ | 141      | $7.1 \times 10^{-8}$  |
| Piperidine                              | $1.4 \times 10^{-4}$ | $1.1 \times 10^{-4}$ | $2.2 \times 10^{-4}$ | 159      | $2.3 \times 10^{-4}$ | $1.7 \times 10^{-4}$ | $3.6 \times 10^{-4}$ | 141      | $1.4 \times 10^{-13}$ |
| N-Acetylneuraminic acid                 | $1.2 \times 10^{-4}$ | $9.5 \times 10^{-5}$ | $1.5 \times 10^{-4}$ | 159      | $1.6 \times 10^{-4}$ | $1.4 \times 10^{-4}$ | $2.0 \times 10^{-4}$ | 141      | $1.8 \times 10^{-19}$ |
| Stearoyl ethanolamide                   | $3.8 \times 10^{-4}$ | $3.3 \times 10^{-4}$ | $4.8 \times 10^{-4}$ | 159      | $4.8 \times 10^{-4}$ | $4.1 \times 10^{-4}$ | $5.6 \times 10^{-4}$ | 141      | $3.7 \times 10^{-10}$ |

1st Q., first quantile; 3rd Q., third quantile; DKD, diabetic kidney disease; DR diabetic retinopathy; T2D, type 2 diabetes.
