# Supplementary material for: Identification of serum metabolome signatures associated with retinal and renal complications of type 2 diabetes
Source: PubMed Central journal article supplement (PMC9829655; doi:10.1038/s43856-022-00231-3), 2023-01-09
Supplement: 43856_2022_231_MOESM2_ESM.pdf [file 43856_2022_231_MOESM2_ESM.pdf]

## Description of Additional Supplementary Files

**File Name:** Supplementary Data 1

**Description:** Source data for the main figures
